# Supplementary material for: Plasma extracellular vesicle synaptic proteins as biomarkers of clinical progression in patients with Parkinson’s disease
Source: eLife journal article supplement (doi:10.7554/elife.87501), 2023-08-02

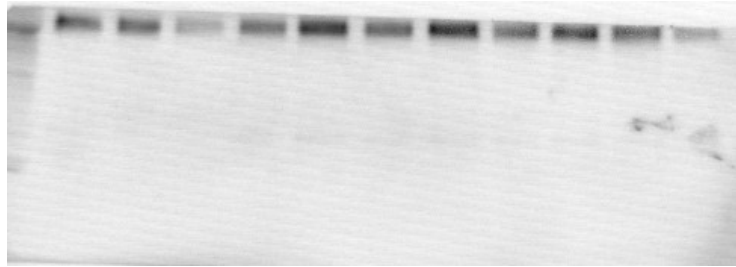

GAP43  
24KDa

C-1 C-2 C-3 PD-1 PD-2 PD-3

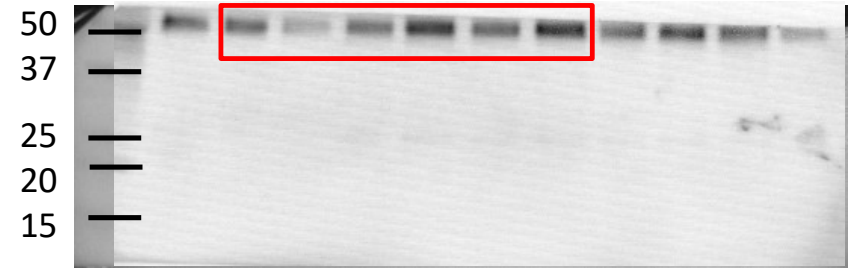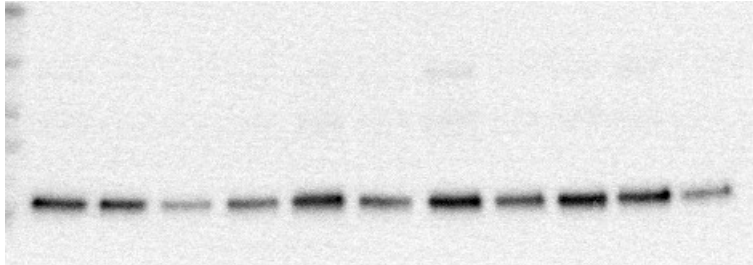

Synaptotagimin 1  
48KDa

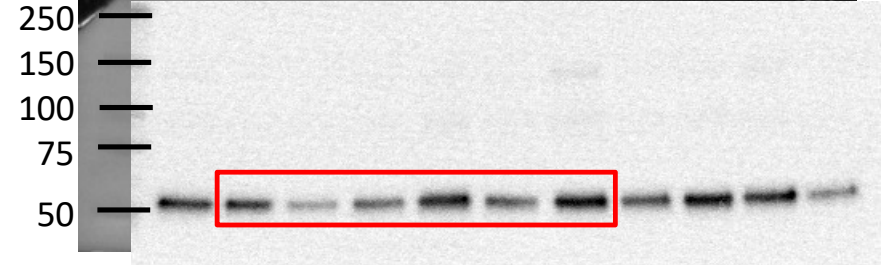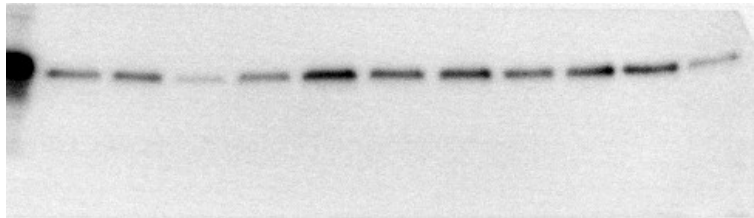

SNAP 25  
23KDa

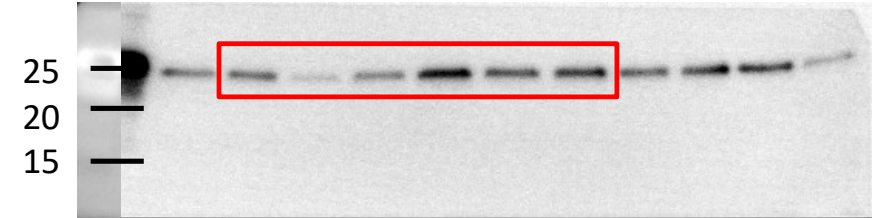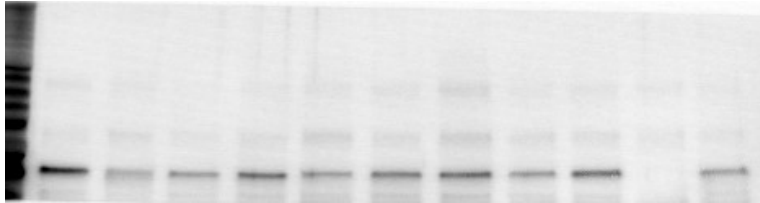

HSP70  
70KDa

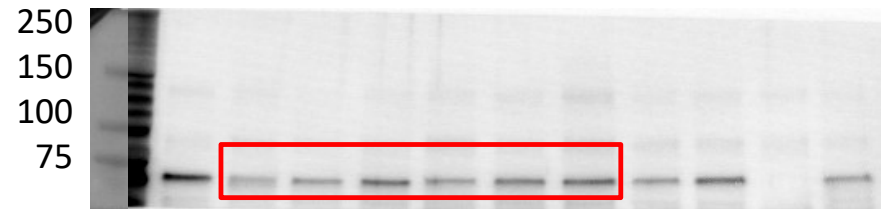

Supplement: fig1-data1 [file elife-87501-fig1-data1-v1.pdf]
